# Supplementary material for: Development and validation of an instrument to measure and manage organizational process variety
Source: PLOS journal article supplement (doi:10.1371/journal.pone.0206198), 2018-10-23
Supplement: S2 (10.1371/journal.pone.0206198.s002) [file journal.pone.0206198.s002]

**S2 Table. Final items to measure process variety.**

| <b>Construct</b>    | <b>Item Code</b>     | <b>Items (1 = fully disagree, ..., 7 = fully agree)</b>                                                                 |
|---------------------|----------------------|-------------------------------------------------------------------------------------------------------------------------|
| Variability         | PC_Variability_1     | Process participants need to follow different process steps from one instance of the process to another.                |
|                     | PC_Variability_2     | Process steps are difficult to predict as they can change from one instance of the process to another.                  |
|                     | PC_Variability_3     | Process execution can vary from one instance of the process to another.                                                 |
|                     | PC_Variability_4     | Process steps vary a lot from case to case.                                                                             |
| Interdependence     | PC_Interdep_1        | Process participants are highly dependent on other participants for process execution.                                  |
|                     | PC_Interdep_2        | Process execution requires very close coordination between process participants.                                        |
|                     | PC_Interdep_3        | The interdependencies between the steps in the process are high.                                                        |
|                     | PC_Interdep_4        | Process participants highly depend on other participants to get required resources.                                     |
| Knowledge-intensity | PC_Knowledge_1       | Process participants need to rely more on experience than on standard procedures.                                       |
|                     | PC_Knowledge_2       | Process execution requires knowledge rather than following standard procedures.                                         |
|                     | PC_Knowledge_3       | Instead of applying standard procedures, process participants need to use their personal judgment.                      |
|                     | PC_Knowledge_4       | Process execution requires participants to make decisions based on experience rather than based on standard procedures. |
| Differentiation     | PC_Differentiation_1 | The process involves process participants from different functions.                                                     |
|                     | PC_Differentiation_2 | Process participants are from different areas of expertise.                                                             |
|                     | PC_Differentiation_3 | Process participants have different functional backgrounds.                                                             |
|                     | PC_Differentiation_4 | Process participants have a variety of different job experiences.                                                       |
| Importance          | PC_Importance_1      | The process is highly valuable to our company.                                                                          |
|                     | PC_Importance_2      | The process is of high strategic importance to our company.                                                             |
|                     | PC_Importance_3      | The process contributes significantly to the value creation of our company.                                             |
|                     | PC_Importance_4      | The process contributes significantly to the competitiveness of our company.                                            |
